# Supplementary material
Source: MDPI journal article supplement (https://www.mdpi.com/2072-4292/15/22/5330)
Supplement: s1 [file s1]

**Table S1.** Correlation coefficients (R) between the PC1 of NEC snow cover variability from the JASMES data with the contemporary atmospheric teleconnections. One asterisk and double asterisks indicate the R exceeding the 95% and 99% confidence levels, respectively.

| Teleconnection indices | R             |
|------------------------|---------------|
| AO                     | <b>-0.34*</b> |
| NAO                    | 0.03          |
| EA                     | -0.07         |
| EAWR                   | -0.04         |
| POL                    | <b>-0.38*</b> |
| SCAND                  | -0.11         |
| WP                     | -0.1          |

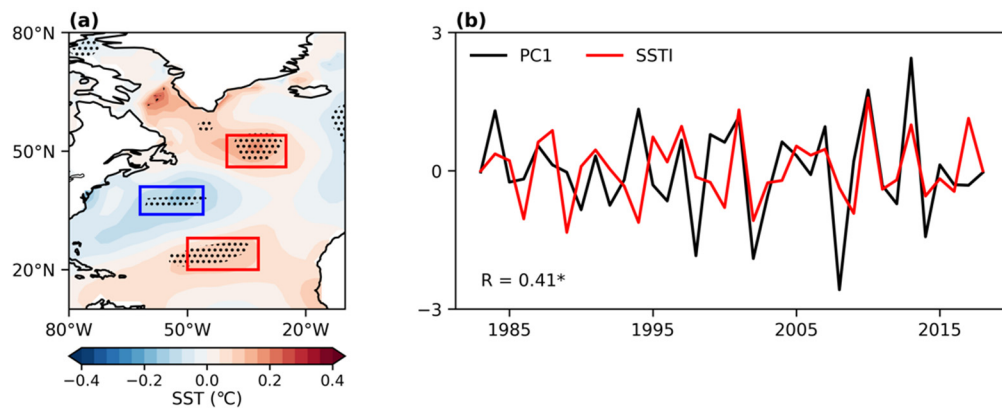

**Figure S1.** (a) SST anomalies over North Atlantic obtained by regression against PC1 of JASMES data. (b) Timeseries of the SSTI and PC1. Black dots in (a) denote the SST anomalies exceeding 95% confidence level. The regions enclosed by rectangles are used to compute the SSTI. The domain of three key regions are 46°–54°N, 25°–40°W; 34°–41°N, 46°–62°W; and 20°–28°N, 32°–50°W for the north, central, and south regions, respectively.

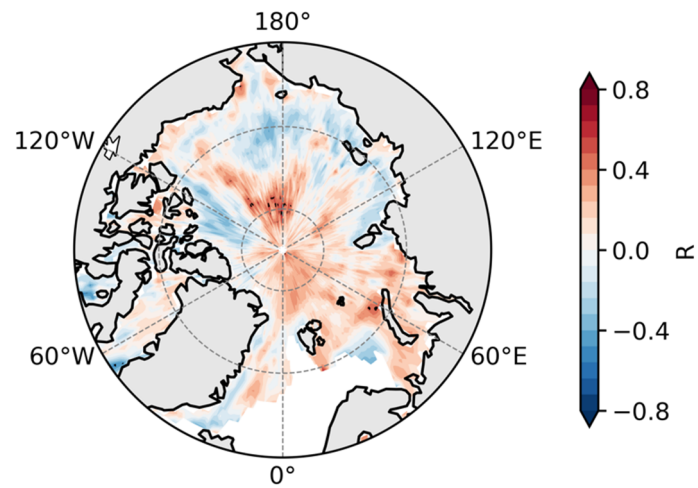

**Figure S2.** Correlations between PC1 of NEC spring snow cover variability from the JASMES data and simultaneous sea ice variations. Dots denote the correlations exceeding the 95% confidence level.
